# Supplementary material for: What Comes First, Job Burnout or Secondary Traumatic Stress? Findings from Two Longitudinal Studies from the U.S. and Poland
Source: PubMed Central journal article supplement (PMC4549333; doi:10.1371/journal.pone.0136730), 2015-08-25
Supplement: pone.0136730.s001.pdf [file pone.0136730.s001.pdf]

**S1 Table. Correlation Matrix among the OLBI Items and the STSS Items in the U.S. Sample at Time 1**

|                | STSS 1 | STSS 2 | STSS 3 | STSS 4 | STSS 5 | STSS 6 | STSS 7 | STSS 8 | STSS 9 | STSS 10 | STSS 11 | STSS 12 | STSS 13 | STSS 14 | STSS 15 | STSS 16 | STSS 17 |
|----------------|--------|--------|--------|--------|--------|--------|--------|--------|--------|---------|---------|---------|---------|---------|---------|---------|---------|
| <b>OLBI 1</b>  | .32*** | .23*** | .07    | .15**  | .33*** | .26*** | .28*** | .25*** | .22*** | .12*    | .23***  | .23***  | .18**   | .32***  | .35***  | .28***  | .13*    |
| <b>OLBI 2</b>  | .21*** | .23*** | .06    | .16**  | .26*** | .15*   | .16**  | .16**  | .19*** | .22***  | .20***  | .11     | .18**   | .27***  | .26***  | .19***  | .15*    |
| <b>OLBI 3</b>  | .37*** | .26*** | .13*   | .25*** | .40*** | .30*** | .34*** | .28*** | .31*** | .21***  | .28***  | .33***  | .24***  | .33***  | .36***  | .38***  | .26***  |
| <b>OLBI 4</b>  | .42*** | .21*** | .21*** | .33*** | .38*** | .34*** | .37*** | .37*** | .40*** | .35***  | .37***  | .35***  | .35***  | .38***  | .40***  | .32***  | .22***  |
| <b>OLBI 5</b>  | .29*** | .19*** | .16**  | .22*** | .33*** | .30*** | .31*** | .34*** | .32*** | .23***  | .28***  | .33***  | .28***  | .33***  | .35***  | .35***  | .22***  |
| <b>OLBI 6</b>  | .36*** | .24*** | .14*   | .16**  | .28*** | .24*** | .30*** | .20*** | .25*** | .12*    | .24***  | .27***  | .16**   | .28***  | .35***  | .29***  | .24***  |
| <b>OLBI 7</b>  | .26*** | .16**  | .05    | .15*   | .30*** | .18**  | .29*** | .21*** | .27*** | .14*    | .21***  | .25***  | .12*    | .27***  | .33***  | .19***  | .17**   |
| <b>OLBI 8</b>  | .43*** | .35*** | .23*** | .28*** | .35*** | .31*** | .39*** | .34*** | .33*** | .32***  | .40***  | .37***  | .29***  | .41***  | .47***  | .35***  | .26***  |
| <b>OLBI 9</b>  | .29*** | .16**  | .09    | .16**  | .24*** | .16**  | .25*** | .20*** | .21*** | .18**   | .26***  | .20***  | .18**   | .22***  | .34***  | .24***  | .16**   |
| <b>OLBI 10</b> | .33*** | .18**  | .16**  | .30*** | .31*** | .26*** | .34*** | .28*** | .39*** | .29***  | .28***  | .35***  | .26***  | .20***  | .34***  | .26***  | .21***  |
| <b>OLBI 11</b> | .31*** | .34*** | .21*** | .21*** | .34*** | .32*** | .36*** | .29*** | .26*** | .23***  | .33***  | .31***  | .25***  | .40***  | .34***  | .39***  | .26***  |
| <b>OLBI 12</b> | .30*** | .25*** | .07    | .25*** | .34*** | .23*** | .37*** | .28*** | .29*** | .32***  | .34***  | .29***  | .22***  | .30***  | .34***  | .25***  | .23***  |
| <b>OLBI 13</b> | .14*   | .11    | .05    | .09    | .17**  | .10    | .15**  | .14*   | .12*   | .06     | .13*    | .17**   | .08     | .23***  | .23***  | .14*    | .14*    |
| <b>OLBI 14</b> | .21*** | .20*** | .07    | .09    | .14*   | .09    | .21*** | .25*** | .26*** | .12*    | .27***  | .21***  | .14*    | .12*    | .24***  | .25***  | .22***  |
| <b>OLBI 15</b> | .32*** | .21*** | .09    | .23*** | .36*** | .28*** | .34*** | .29*** | .31*** | .15**   | .25***  | .31***  | .21***  | .28***  | .39***  | .31***  | .24***  |
| <b>OLBI 16</b> | .33*** | .27*** | .14*   | .21*** | .34*** | .29*** | .28*** | .26*** | .25*** | .21***  | .25***  | .25***  | .20***  | .24***  | .38***  | .26***  | .18**   |

*Note.* OLBI = Oldenburg Burnout Inventory; STSS = Secondary Traumatic Stress Scale. \* $p < .05$ ; \*\* $p < .01$ ; \*\*\* $p < .001$ .
