# Supplementary material for: What Comes First, Job Burnout or Secondary Traumatic Stress? Findings from Two Longitudinal Studies from the U.S. and Poland
Source: PubMed Central journal article supplement (PMC4549333; doi:10.1371/journal.pone.0136730), 2015-08-25
Supplement: pone.0136730.s002.pdf [file pone.0136730.s002.pdf]

**S2 Table. Correlation Matrix among the OLBI Items and the STSS Items in the Polish Sample at Time 1**

|                | STSS 1 | STSS 2 | STSS 3 | STSS 4 | STSS 5 | STSS 6 | STSS 7 | STSS 8 | STSS 9 | STSS 10 | STSS 11 | STSS 12 | STSS 13 | STSS 14 | STSS 15 | STSS 16 | STSS 17 |
|----------------|--------|--------|--------|--------|--------|--------|--------|--------|--------|---------|---------|---------|---------|---------|---------|---------|---------|
| <b>OLBI 1</b>  | .14*   | .00    | .10    | .19*** | .38*** | .30*** | .32*** | .22*** | .33*** | .04     | .23***  | .31***  | .21***  | .26***  | .29***  | .27***  | .19***  |
| <b>OLBI 2</b>  | .06    | .13*   | .13*   | .22*** | .34*** | .27*** | .32*** | .28*** | .29*** | .22***  | .29***  | .26***  | .28***  | .24***  | .28***  | .21***  | .08     |
| <b>OLBI 3</b>  | .09    | .10    | .23*** | .35*** | .49*** | .42*** | .38*** | .41*** | .43*** | .26***  | .35***  | .38***  | .29***  | .31***  | .38***  | .32***  | .22***  |
| <b>OLBI 4</b>  | -.01   | .18**  | .31*** | .46*** | .38*** | .44*** | .28*** | .43*** | .43*** | .35***  | .51***  | .42***  | .39***  | .37***  | .38***  | .32***  | .26***  |
| <b>OLBI 5</b>  | -.05   | .10    | .21*** | .39*** | .37*** | .42*** | .25*** | .38*** | .38*** | .25***  | .44***  | .41***  | .33***  | .38***  | .36***  | .37***  | .25***  |
| <b>OLBI 6</b>  | .12*   | .02    | .15*   | .16**  | .30*** | .25*** | .21*** | .15**  | .23*** | .06     | .19***  | .27***  | .17**   | .18**   | .28***  | .19***  | .23***  |
| <b>OLBI 7</b>  | .11*   | -.01   | .05    | .14*   | .22*** | .24*** | .24*** | .21*** | .25*** | .14*    | .20***  | .31***  | .24***  | .22***  | .25***  | .20***  | .16**   |
| <b>OLBI 8</b>  | -.03   | .17**  | .33*** | .41*** | .48*** | .48*** | .33*** | .47*** | .46*** | .32***  | .51***  | .40***  | .39***  | .32***  | .45***  | .35***  | .26***  |
| <b>OLBI 9</b>  | .15**  | .11    | .13*   | .15**  | .27*** | .21*** | .23*** | .24*** | .21*** | .14*    | .23***  | .24***  | .18**   | .24***  | .32***  | .17**   | .14*    |
| <b>OLBI 10</b> | -.05   | .17**  | .26*** | .39*** | .45*** | .46*** | .36*** | .40*** | .46*** | .27***  | .37***  | .39***  | .35***  | .30***  | .30***  | .32***  | .20***  |
| <b>OLBI 11</b> | .19*** | .04    | .09    | .17**  | .29*** | .29*** | .35*** | .30*** | .27*** | .17**   | .24***  | .30***  | .25***  | .30***  | .33***  | .28***  | .23***  |
| <b>OLBI 12</b> | .05    | .07    | .22*** | .24*** | .38*** | .36*** | .29*** | .34*** | .38*** | .27***  | .37***  | .34***  | .25***  | .24***  | .36***  | .26***  | .20***  |
| <b>OLBI 13</b> | -.14*  | .06    | .14*   | .10    | .11*   | .12*   | .07    | .14*   | .13*   | .04     | .17**   | .18***  | .12*    | .17**   | .10     | .02     | .05     |
| <b>OLBI 14</b> | -.01   | .09    | .12*   | .24*** | .28*** | .29*** | .17**  | .22*** | .31*** | .16**   | .30***  | .28***  | .16**   | .25***  | .14*    | .21***  | .17**   |
| <b>OLBI 15</b> | .05    | .01    | .07    | .17**  | .28*** | .23*** | .32*** | .22*** | .27*** | .15**   | .22***  | .25***  | .20***  | .19***  | .21***  | .15*    | .21***  |
| <b>OLBI 16</b> | .10    | -.03   | .09    | .16**  | .34*** | .33*** | .37*** | .35*** | .43*** | .13*    | .32***  | .39***  | .17**   | .26***  | .32***  | .28***  | .20***  |

*Note.* OLBI = Oldenburg Burnout Inventory; STSS = Secondary Traumatic Stress Scale. \* $p < .05$ ; \*\* $p < .01$ ; \*\*\* $p < .001$ .
